# Supplementary material
Source: PubMed Central journal article supplement (PMC8691524)
Supplement: NIHMS1581362-supplement-3.pdf [file NIHMS1581362-supplement-3.pdf]

**KEY RESOURCES TABLE**

| REAGENT or RESOURCE                                  | SOURCE   | IDENTIFIER |
|------------------------------------------------------|----------|------------|
| <b>Antibodies</b>                                    |          |            |
|                                                      |          |            |
|                                                      |          |            |
|                                                      |          |            |
|                                                      |          |            |
| <b>Bacterial and Virus Strains</b>                   |          |            |
|                                                      |          |            |
|                                                      |          |            |
|                                                      |          |            |
|                                                      |          |            |
| <b>Biological Samples</b>                            |          |            |
|                                                      |          |            |
|                                                      |          |            |
|                                                      |          |            |
|                                                      |          |            |
| <b>Chemicals, Peptides, and Recombinant Proteins</b> |          |            |
|                                                      |          |            |
|                                                      |          |            |
|                                                      |          |            |
|                                                      |          |            |
| <b>Critical Commercial Assays</b>                    |          |            |
| Illumina TruSeq RNA Sample Prep kit v2.0             | Illumina |            |
|                                                      |          |            |
|                                                      |          |            |
|                                                      |          |            |
| <b>Deposited Data</b>                                |          |            |
|                                                      |          |            |
|                                                      |          |            |
|                                                      |          |            |
|                                                      |          |            |
| <b>Experimental Models: Cell Lines</b>               |          |            |
|                                                      |          |            |
|                                                      |          |            |
|                                                      |          |            |
|                                                      |          |            |
| <b>Experimental Models: Organisms/Strains</b>        |          |            |

|                                                                                                                       |                                                                       |                |
|-----------------------------------------------------------------------------------------------------------------------|-----------------------------------------------------------------------|----------------|
| Chlamydomonas mutant strains in background CC-4403/4402; list of all strains included in STAR Methods                 | Susan Dutcher, James Umen, laboratory stocks                          |                |
|                                                                                                                       |                                                                       |                |
|                                                                                                                       |                                                                       |                |
|                                                                                                                       |                                                                       |                |
|                                                                                                                       |                                                                       |                |
| Oligonucleotides                                                                                                      |                                                                       |                |
|                                                                                                                       |                                                                       |                |
|                                                                                                                       |                                                                       |                |
|                                                                                                                       |                                                                       |                |
|                                                                                                                       |                                                                       |                |
| Recombinant DNA                                                                                                       |                                                                       |                |
|                                                                                                                       |                                                                       |                |
|                                                                                                                       |                                                                       |                |
|                                                                                                                       |                                                                       |                |
|                                                                                                                       |                                                                       |                |
| Software and Algorithms                                                                                               |                                                                       |                |
| MATLAB and code generated in-house to execute the project                                                             | MATLAB: Mathworks; code: generated by FC in the course of the project |                |
|                                                                                                                       |                                                                       |                |
|                                                                                                                       |                                                                       |                |
|                                                                                                                       |                                                                       |                |
| Other                                                                                                                 |                                                                       |                |
| Sytox Green                                                                                                           | Thermo-Fisher                                                         | S7020          |
| Accuri C6 flow cytometer                                                                                              | BD Biosciences                                                        | C6             |
| Axioskop 40 tetrad dissection microscope                                                                              | Zeiss                                                                 | Axioskop 40 FL |
| Canon Rebel EOS 50D camera attached to Zeiss camera tube on Axioskop 40                                               | Canon                                                                 | EOS 50D        |
| In-house modified stage for Axioskop 40 allowing accurate alignment of positions in standard 386 microplate positions | In-house; 3-D printer specs available on request                      | NA             |
